# Supplementary material for: Identification of HCV Resistant Variants against Direct Acting Antivirals in Plasma and Liver of Treatment Naïve Patients
Source: PubMed Central journal article supplement (PMC5498547; doi:10.1038/s41598-017-04931-y), 2017-07-05
Supplement: 41598_2017_4931_MOESM1_ESM.pdf [file 41598_2017_4931_MOESM1_ESM.pdf]

## Supplementary Information

### Identification of HCV Resistant Variants against Direct Acting Antivirals in Plasma and Liver of Treatment Naïve Patients

V. Stalin Raj<sup>1</sup>, Gadissa Bedada Hundie<sup>1</sup>, Anita C. Schürch<sup>1</sup>, Saskia L. Smits<sup>1,2</sup>, Suzan D. Pas<sup>1</sup>, Sophie Le Pogam<sup>3</sup>, Harry L.A. Janssen<sup>4,5</sup>, Rob J. de Knecht<sup>4</sup>, Albert D.M.E. Osterhaus<sup>6,7</sup>, Isabel Najera<sup>3</sup>, Charles A. Boucher<sup>1</sup>, Bart L. Haagmans<sup>1\*</sup>

<sup>1</sup>Department of Viroscience, Erasmus Medical Center, Rotterdam, the Netherlands

<sup>2</sup>Viroclinics Biosciences BV, Rotterdam, the Netherlands

<sup>3</sup>Virology Discovery, Pharma Research Early Development Hoffmann La Roche, Nutley, NJ, USA

<sup>4</sup>Department of Gastroenterology and Hepatology, Erasmus Medical Center, Rotterdam, the Netherlands

<sup>5</sup>Division of Gastroenterology, University Health Network, Toronto, Canada

<sup>6</sup>Artemis One health, Utrecht, the Netherlands;

<sup>7</sup>Center for Infection Medicine and Zoonoses Research, University of Veterinary Medicine, Hannover, Germany

\*Corresponding author. Bart L. Haagmans

E-mail: [b.haagmans@erasmusmc.nl](mailto:b.haagmans@erasmusmc.nl)

## Supplementary Tables

Table S1: Patient characteristics at baseline

| Patient | Age (Years) | Sex <sup>a</sup> | Serum viral load (IU/ml) | ALT | Fibrosis |
|---------|-------------|------------------|--------------------------|-----|----------|
| 1       | 55          | M                | 2.60 ×10 <sup>6</sup>    | 195 | 5        |
| 2       | 48          | F                | 4.95 ×10 <sup>6</sup>    | 91  | 3        |
| 3       | 45          | M                | 3.66 ×10 <sup>6</sup>    | 79  | 3        |
| 4       | 29          | M                | 1.63 ×10 <sup>6</sup>    | 67  | 2        |
| 5       | 43          | F                | 2.30 ×10 <sup>6</sup>    | 35  | 1        |
| 6       | 25          | F                | 3.90 ×10 <sup>6</sup>    | 48  | 1        |
| 7       | 47          | M                | 4.60×10 <sup>6</sup>     | 68  | 2        |
| 8       | 36          | M                | 6.98 ×10 <sup>6</sup>    | 85  | NA       |
| 9       | 54          | M                | 1.71 ×10 <sup>6</sup>    | 107 | 4        |
| 10      | 54          | M                | 4.20 ×10 <sup>6</sup>    | 59  | 3        |
| 11      | 37          | F                | 7.81×10 <sup>5</sup>     | 31  | 3        |
| 12      | 45          | F                | 1.65 ×10 <sup>6</sup>    | 43  | 0        |
| 13      | 53          | M                | 1.84 ×10 <sup>6</sup>    | 19  | 1        |
| 14      | 39          | M                | 5.13 ×10 <sup>6</sup>    | 86  | 5        |
| 15      | 27          | M                | 1.65 ×10 <sup>6</sup>    | 61  | 2        |
| 16      | 21          | M                | 4.81 ×10 <sup>5</sup>    | 65  | 1        |
| 17      | 31          | M                | 2.23 ×10 <sup>6</sup>    | 41  | NA       |
| 18      | 60          | M                | 6.46 ×10 <sup>6</sup>    | 73  | 3        |

<sup>a</sup> M, male; F, female; NA, not available

Table S2: DPS primer sequence

| No | Primer name  | Adopter                  | Taq          | MID                                         | Genespecific primer     |
|----|--------------|--------------------------|--------------|---------------------------------------------|-------------------------|
| 1  | Pt1FNS5bMID1 | 5'-CGTATCGCCTCCCTCGGCCA  | TCAGACGAGTGC | GTGGGGATCCC                                 | GATGATACCCGCTGCTTTGA-3' |
| 2  | Pt2RNS5bMID2 | 5'-CTATGCGCCTTGCCAGCCCGC | TCAG         | ACGCTCGACAGGCGGAATTCCTGGTCATAGCCTCCGTGAA-3' |                         |
| 3  | Pt2RNS5bMID3 | 5'-CTATGCGCCTTGCCAGCCCGC | TCAGAGACGC   | ACTGGCGGAATTCCTGGTCATAGCCTCCGTGAA-3'        |                         |
| 4  | Pt2RNS5bMID4 | 5'-CTATGCGCCTTGCCAGCCCGC | TCAGAGCACTG  | TAGGGCGGAATTCCTGGTCATAGCCTCCGTGAA-3'        |                         |
| 5  | Pt2RNS5bMID5 | 5'-CTATGCGCCTTGCCAGCCCGC | TCAGATCAGAC  | ACGGCGGAATTCCTGGTCATAGCCTCCGTGAA-3'         |                         |
| 6  | Pt2RNS5bMID6 | 5'-CTATGCGCCTTGCCAGCCCGC | TCAGATATCG   | GAGGGCGGAATTCCTGGTCATAGCCTCCGTGAA-3'        |                         |
| 7  | Pt2RNS5bMID7 | 5'-CTATGCGCCTTGCCAGCCCGC | TCAGCGTGTCT  | ATAGGCGGAATTCCTGGTCATAGCCTCCGTGAA-3'        |                         |
| 8  | Pt2RNS5bMID8 | 5'-CTATGCGCCTTGCCAGCCCGC | TCAG         | CTCGGTGTGCGGCGGAATTCCTGGTCATAGCCTCCGTGAA-3' |                         |

MID- multiples identifier

Table S3: Amount of HCV reads, haplotypes, and Simpson’s diversity index per liver (L) or plasma (P) sample of each patient.

| <b>Patient</b> | <b>No of reads</b> | <b>No of “cleaned” reads</b> | <b>No reads of haplotypes with frequencies of more than 1%</b> | <b>No haplotypes</b> | <b>Simpson's Diversity Index</b> |
|----------------|--------------------|------------------------------|----------------------------------------------------------------|----------------------|----------------------------------|
| 1L             | 16049              | 15650                        | 13588                                                          | 4                    | 0.14                             |
| 1P             | 17913              | 17540                        | 15725                                                          | 2                    | 0.08                             |
| 2L             | 18885              | 18411                        | 16381                                                          | 4                    | 0.23                             |
| 2P             | 18361              | 18010                        | 16240                                                          | 6                    | 0.21                             |
| 3L             | 14094              | 13672                        | 8185                                                           | 11                   | 0.77                             |
| 3P             | 27949              | 27102                        | 23350                                                          | 2                    | 0.06                             |
| 4L             | 27468              | 26241                        | 21966                                                          | 6                    | 0.48                             |
| 4P             | 29496              | 28706                        | 23879                                                          | 5                    | 0.48                             |
| 5L             | 29960              | 28893                        | 23641                                                          | 6                    | 0.47                             |
| 5P             | 31467              | 30685                        | 24433                                                          | 5                    | 0.45                             |
| 6L             | 25874              | 24743                        | 19848                                                          | 2                    | 0.5                              |
| 6P             | 26824              | 25742                        | 21612                                                          | 4                    | 0.37                             |
| 7L             | 29932              | 27883                        | 22646                                                          | 5                    | 0.29                             |
| 7P             | 27569              | 26828                        | 21128                                                          | 4                    | 0.41                             |
| 8L             | 24848              | 24111                        | 21144                                                          | 3                    | 0.06                             |
| 8P             | 21393              | 20198                        | 16800                                                          | 5                    | 0.24                             |
| 9L             | 17643              | 16750                        | 10546                                                          | 14                   | 0.89                             |
| 9P             | 21213              | 20267                        | 15883                                                          | 6                    | 0.37                             |
| 10L            | 13760              | 12948                        | 9933                                                           | 7                    | 0.82                             |
| 10P            | 26634              | 25865                        | 21036                                                          | 4                    | 0.58                             |
| 11L            | 16836              | 16013                        | 13191                                                          | 4                    | 0.45                             |
| 11P            | 24273              | 23343                        | 19020                                                          | 7                    | 0.58                             |
| 12L            | 14365              | 13498                        | 12056                                                          | 3                    | 0.28                             |
| 12P            | 22374              | 21430                        | 18806                                                          | 6                    | 0.3                              |
| 13L            | 17245              | 16327                        | 14248                                                          | 4                    | 0.15                             |
| 13P            | 23966              | 22655                        | 19090                                                          | 5                    | 0.33                             |
| 14L            | 33251              | 31536                        | 24757                                                          | 7                    | 0.61                             |
| 14P            | 36010              | 34662                        | 28486                                                          | 7                    | 0.64                             |
| 15L            | 28058              | 27543                        | 24066                                                          | 5                    | 0.49                             |
| 15P            | 37164              | 36292                        | 31941                                                          | 4                    | 0.48                             |
| 16L            | 32415              | 30081                        | 22151                                                          | 4                    | 0.24                             |
| 16P            | 22707              | 22075                        | 19664                                                          | 2                    | 0.02                             |
| 17L            | 28402              | 27409                        | 21067                                                          | 10                   | 0.72                             |
| 17P            | 25854              | 24885                        | 21212                                                          | 5                    | 0.56                             |
| 18L            | 8605               | 8400                         | 7089                                                           | 5                    | 0.56                             |
| 18P            | 23761              | 23209                        | 19571                                                          | 3                    | 0.26                             |

Table S4: Detection of HCV-NS5B resistant variants by DPS (% of total cleaned reads).

| Patient       | S282T | C316N | C316H | C316Y | V321I | D244N | Q309R | D310N | S326G | T329I | A333E |
|---------------|-------|-------|-------|-------|-------|-------|-------|-------|-------|-------|-------|
| <i>cutoff</i> | 0     | 0.2   | 0.2   | 0.2   | 0     | 0     | 0     | 0     | 0     | 0     | 0.4   |
| 1L            | 0     | 99.9  | 0     | 0     | 0     | 0     | 0.23  | 0.02  | 0     | 0     | 0     |
| 1P            | 0     | 99.92 | 0     | 0     | 0     | 0     | 0     | 0     | 0     | 0     | 0     |
| 2L            | 0     | 0     | 0     | 0     | 0     | 0     | 0     | 0     | 0     | 0     | 0     |
| 2P            | 0     | 4.38  | 0     | 0     | 0.03  | 0     | 0.54  | 0     | 0     | 0     | 0     |
| 3L            | 0     | 65.66 | 3.12  | 5.63  | 0     | 0.02  | 5.82  | 0     | 0     | 0.02  | 0     |
| 3P            | 0     | 99.81 | 0     | 0     | 0     | 0     | 0.18  | 0.03  | 0     | 0.07  | 0     |
| 4L            | 0     | 99.93 | 0     | 0     | 0.02  | 0     | 0.11  | 0     | 0     | 0     | 0     |
| 4P            | 0     | 99.88 | 0     | 0     | 0     | 0.02  | 0.19  | 0.04  | 0.03  | 0     | 0     |
| 5L            | 0     | 20.77 | 0     | 0     | 0     | 0     | 0.25  | 0.22  | 0.03  | 0.04  | 0     |
| 5P            | 0     | 0     | 0     | 0     | 0.04  | 0.05  | 0.21  | 0.08  | 0.06  | 0.07  | 0     |
| 6L            | 0     | 99.92 | 0     | 0     | 0.02  | 0     | 0.35  | 0.88  | 0     | 0     | 0     |
| 6P            | 0     | 99.83 | 0     | 0     | 0     | 0     | 0.21  | 0     | 0     | 0     | 0     |
| 7L            | 0     | 0.28  | 0     | 0     | 0.02  | 0.11  | 0.51  | 0.02  | 0.02  | 0.08  | 0     |
| 7P            | 0     | 0     | 0     | 0     | 0.01  | 0.04  | 0.62  | 0.03  | 0.06  | 0.09  | 0     |
| 8L            | 0     | 0.34  | 0     | 99.47 | 0.03  | 0.07  | 99.53 | 0.07  | 0.02  | 0.14  | 0     |
| 8P            | 0     | 13.66 | 0.8   | 85.26 | 0     | 0.04  | 85.28 | 0.03  | 0.08  | 0.07  | 0     |
| 9L            | 0     | 11.55 | 43.91 | 1.39  | 0.02  | 0.01  | 2.42  | 0.2   | 0.17  | 0.2   | 0     |
| 9P            | 0     | 13.27 | 0     | 0     | 0     | 0.13  | 0.48  | 0.02  | 0.03  | 0.16  | 0     |
| 10L           | 0     | 73.55 | 0.64  | 0     | 0     | 0     | 0.9   | 0.1   | 0     | 0.12  | 0     |
| 10P           | 0     | 99.56 | 0     | 0     | 0     | 0.08  | 0.4   | 0     | 0.05  | 0.07  | 0     |
| 11L           | 0     | 0     | 0     | 0     | 0.03  | 0     | 0.68  | 0     | 0.07  | 0.03  | 0     |
| 11P           | 0     | 0     | 0     | 0     | 0     | 0     | 0.42  | 0.03  | 0.06  | 0.11  | 0     |
| 12L           | 0     | 0.3   | 0.65  | 0     | 0     | 0     | 0.16  | 0     | 0     | 0     | 0     |
| 12P           | 0     | 7.31  | 0     | 0     | 0     | 0.04  | 0.28  | 0     | 0.03  | 0     | 0     |
| 13L           | 0     | 0     | 1.7   | 0     | 0     | 0     | 94.17 | 0     | 0     | 0.01  | 0     |
| 13P           | 0     | 0     | 0     | 0     | 0     | 0     | 83.41 | 0     | 0.11  | 0.17  | 0     |
| 14L           | 0     | 0     | 97.41 | 0     | 0     | 0     | 2.53  | 0.09  | 0.28  | 0.05  | 0     |
| 14P           | 0     | 0     | 99.73 | 0     | 0.02  | 0.01  | 0.88  | 0.02  | 0     | 0.04  | 0     |
| 15L           | 0     | 99.93 | 0     | 0     | 0.03  | 0.09  | 72.61 | 0.02  | 0     | 0.85  | 0     |
| 15P           | 0     | 99.91 | 0     | 0     | 0     | 0.06  | 71.42 | 0     | 0     | 0.8   | 0     |
| 16L           | 0     | 99.84 | 0     | 0     | 0     | 0     | 0.25  | 0     | 0.05  | 0     | 0     |
| 16P           | 0     | 97.78 | 0     | 0     | 0     | 0     | 0.18  | 0     | 0     | 0     | 0     |
| 17L           | 0     | 2.9   | 0     | 0     | 0     | 0     | 94.69 | 0     | 0.01  | 0.03  | 0     |
| 17P           | 0     | 0.55  | 0     | 0     | 0     | 0     | 98.82 | 0     | 0     | 0.08  | 0     |
| 18L           | 0     | 0     | 0     | 0     | 0     | 0     | 0.23  | 0     | 0     | 0     | 0     |
| 18P           | 0     | 0     | 0     | 0     | 0     | 0     | 0.39  | 0     | 0     | 0     | 0     |

L, liver; P, plasma. Cut-off, position specific error rate determined in control experiments.
